# Supplementary material for: Hypusinated eIF5A Promotes Ribosomal Frameshifting during Decoding of ODC Antizyme mRNA in Saccharomyces cerevisiae
Source: MDPI journal article supplement (doi:10.3390/ijms232112972), 2022-10-26
Supplement: s1 [file s1]

**Halwas, K., Döring, L.-D., Oehlert, F.V. and Dohmen, R.J. Supplementary Material**

Material includes:

Figure S1: Western blot analyses for RFS as well as in-frame reporters, and total protein staining relating to Figure 4

Figure S2: Plasmid sequences

Table S1: Quantification of anti-Myc western blot signals of blot shown in Fig. 4

Table S2: *S. cerevisiae* strains used in this study

Table S3: Plasmids used in this study

Table S4: Antibodies used in this study

Figure S1

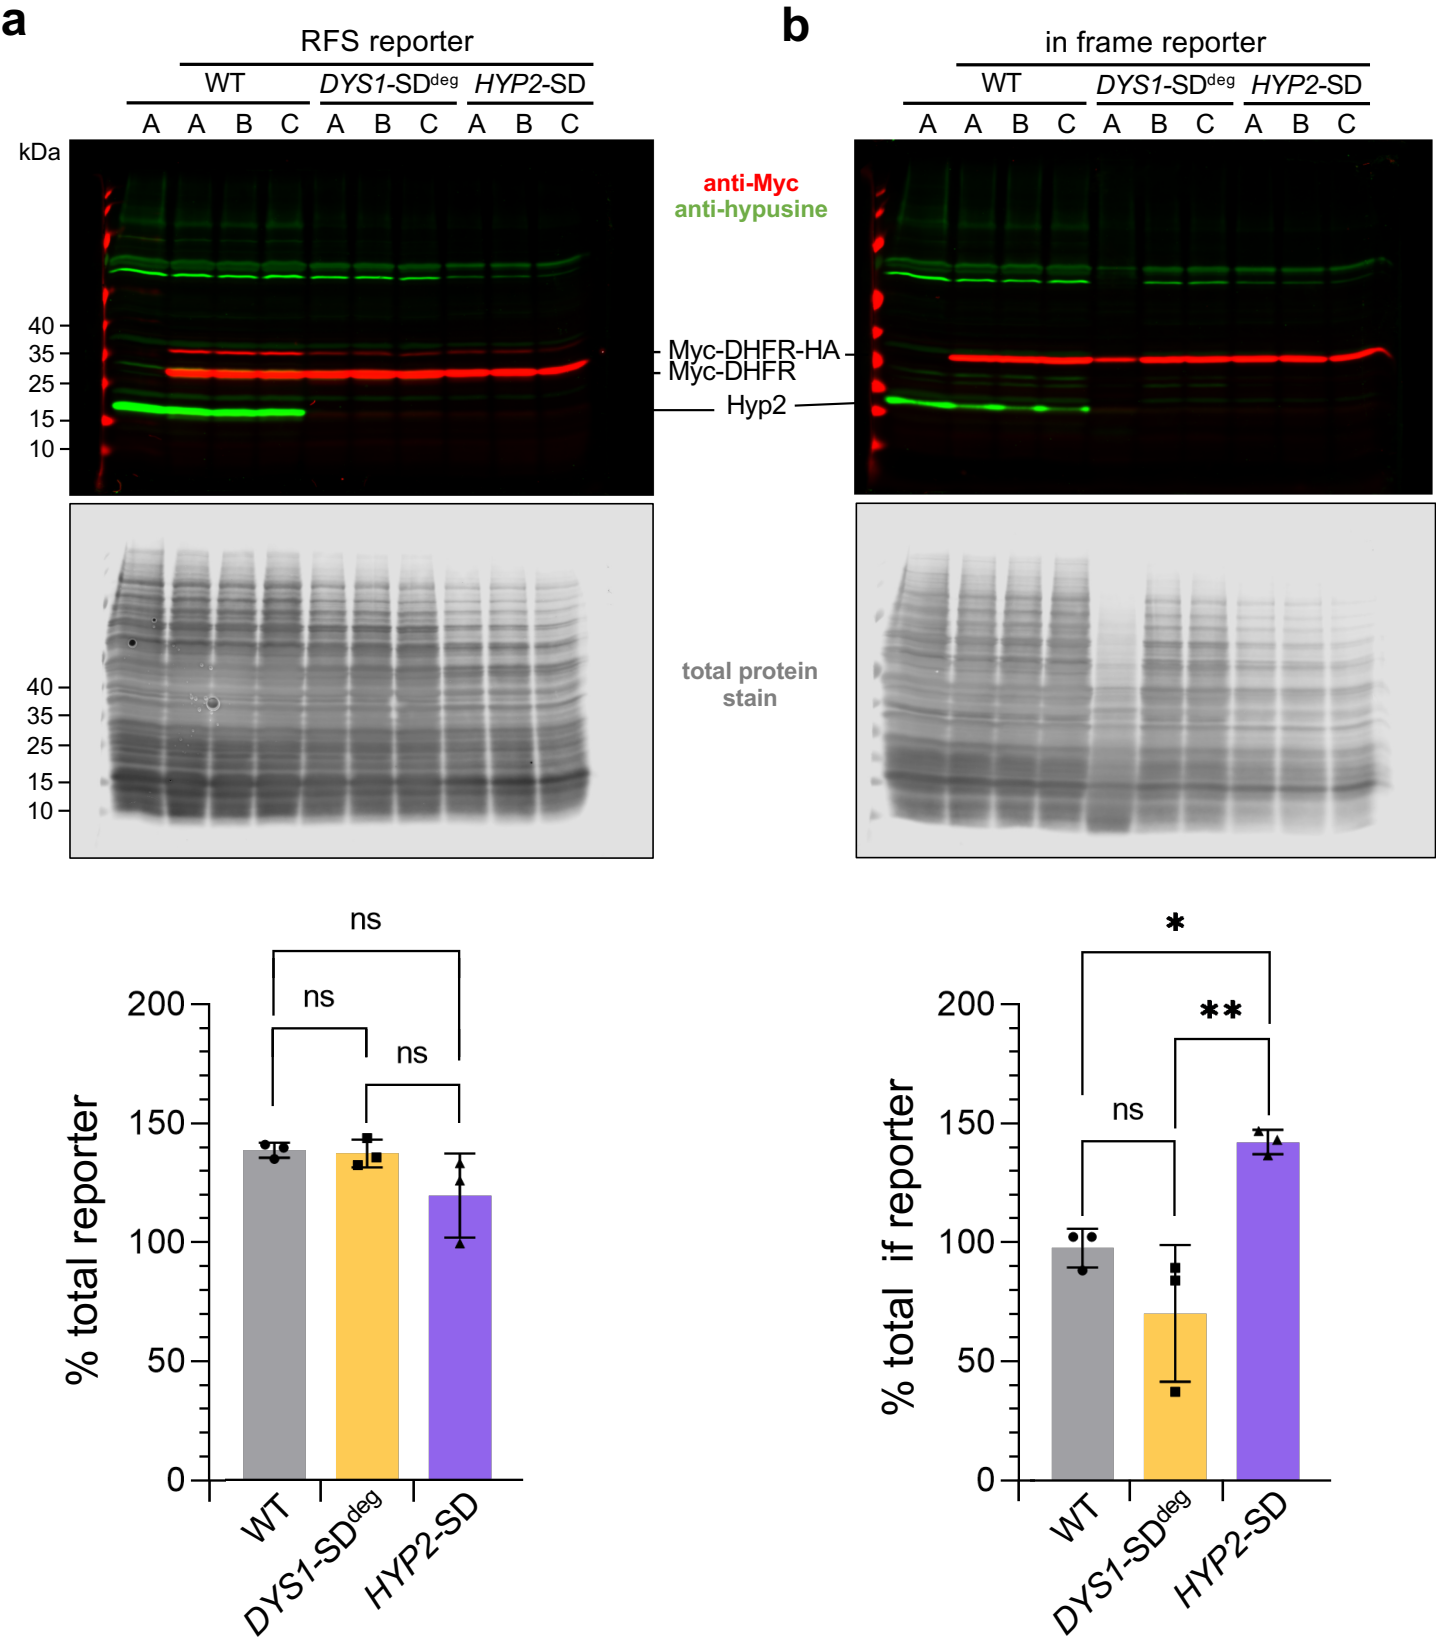

### Legend to Figure S1:

Western blot analyses for RFS as well as in-frame reporters, and total protein staining relating to Figure 4. (a) Shown are the additional data for the same blots shown in figure 4a, in which wild type (wt), *HYP2*-SD, and *DYS1*-SD<sup>deg</sup> expressing the RFS reporter were analyzed. The top panel shows the full scan of the blot after anti-MYC and anti-hypusine detection. The lower panel shows the total protein stain of the same blot. Below the quantification of the total reporter signal (signals for both bands added together) after normalization to total protein signals is shown. Means, standard deviations and significance were calculated as in figure 4. (b) same as in (a) but for cells expressing the in frame (if) reporter. For the quantification, the signals of one apparently underloaded lane with one of the *DYS1*-SD<sup>deg</sup> spore clones was not considered.

**pFO1/2** pUC21-NotI-P<sub>URA3</sub>-URA3-P<sub>ADH1</sub>-2xMyc-DHFR-RFS<sub>OAZ1</sub> (t) /if-2xHA-T<sub>CYC1</sub>-T<sub>URA3</sub>-NotI

ataccgctcgcgcagccgaacgaccgagcgcagcagtcagtgagcgaggaagcggaag

**pKH13** [pJET1.2-**P<sub>DYS1</sub>**-**P<sub>TEF</sub>**-**his5**-**T<sub>TEF</sub>**-**P<sub>GAL</sub>**-**tc3**-**Ub**-**R**-**HA**-**ORF<sub>DYS1</sub>**]

CCCCCTGCAGCCGAATTATATTATTTTGGCCAAATAATTTTAAACAAAAGCTCTGAAGTCTTCTTCATTTAAATCTTTAGATGATACTTCATCTGGAA  
AATTGTCCCAATTAGTAGCATCAGCGTGTGAGTAAGTTCTAAACCATTTTTTTTATTGTTGTATTATCTCTAATCTTACTACTCGATGAGTTTTCGGTA  
TTATCTCTATTTTTAACTTGGAGCAGGTTCCATTTCATGTTTTTTTTCATCATAGTGAATAAAATCAACTGCTTTAACTTGTGCTGAAACACCATAT  
CCATCCGGCGTAATACGACTCACTATAGGGAGAGCGGCCCGCAGATCTCCGGATGGCTCGAGTTTTTCAGCAAGATGCATGCGGC**CGCATTACGGGA**  
**AGAACTGAAAAAAGGTGGGAAAAAATAAAAGTAAAGTGAAAAATTAATGTAATGTATATTTCCATTTTGACGCAAAGTACTTCCCTCTATCA**  
**GTTTTGTATCTAACTGCAGAGTAAAGTCGTGTTTTGCTTAGTTAA**GAATTCGTTTAGCTTGCCCTCGTCCCGCCGGGTCAACCGGCCAGCGACATGG  
AGGCCAGAATACCTCCTTGACAGTCTTGACGTGCGCAGCTCAGGGGCATGATGTGACTGTGCGCCGTACATTTAGCCCATACATCCCATGTATAA  
TCATTTGCATCCATACATTTTGATGGCCGCACGGCGGAAGCAAAAATTACGGCTCCTCGCTGCAGACCTGCGAGCAGGGAACGCTCCCTCACAGA  
CGCGTTGAATTGTCCCCACGCCGCCCTGTAGAGAAATATAAAAGGTTAGGATTGTGCCACTGAGGTTCTTCTTTCATATACTTCCTTTTAAATCT  
TGCTAGGATACAGTTCTCACATCACATCCGAACATAAACACCC**ATGGGTAGGAGGGCTTTTGTAGAAGAAATACGAACGAAACGAAATCAGCGTTG**  
**CCATCGCTTTGGACAAAGCTCCCTTACCTGAAGAGTCGAATTTATTGATGAACCTATAACTTCCAAGCATGCAAAACCAAAAGGGAGACAAGTAAT**  
**CAAGTAGACACGGGAATTGGATTCTTGGATCACATGTATCATGCACTGGCTAAACATGCAGGCTGGAGCTTACGACTTTACTCAAGAGGTGATTTAAT**  
**CATCGATGATCATCACTGCAGAAGATACCTGCTATTGCACCTGGTATTGCATTCAAGCAGGCTATGGGTAACCTTGCCGGCGCTTAAAGATTGGAC**  
**ATGCTTATTGTCCACTTGACGAAGCTCTTCTAGAAGCGTAGTTGACTTGTGCGGACGGCCCTATGCTGTTATCGATTGGGATTAAAGCGTAAAA**  
**GTGGGGAATTGTCTGTGAAATGATCCCTCACTTACTATATTCCTTTTCGGTAGCAGCTGGAATTACTTTGCATGTTACCTGCTTATATGGTAGTAA**  
**TGACCATCATCGTGCCTGAAAGCGCTTTTAAATCTCTGCGCTGTGCCATGCGCGCGGCTACTAGTCTTACTGGAACTTCTGAAGTCCCAAGCACGAAG**  
**GAGTGTGTAA**AGAGTACTGACAATAAAAAGATTCTTGTTCCTCAAGAACTTGTCAATTTGTATAGTTTTTTTATATTGTAGTTGTCTATTTTAAATCAA  
ATGTTAGCGTGATTTATATTTTTTTTTCGCCTCGACATCATCTGCCAGATGCGAAGTTAAGTGCAGAAAGTAATATCATGCGTCAATCGTATGTGA  
ATGCTGGTTCGTATACTGCTGTCGATTTCGATACTAACGCCGCCATCCAgtttaaac**GAGCTCTAGTACGGATTAGAAGCCGCGGAGGGGTGACAGCC**  
**CTCCGAAGGAAGACTTCCCTCGTGCCTCTCGCTTTCACCGTTCGGTTTCTGAAACGCAAGATGTGCTTCGCGCCGCACTGCTCCGAACAATAAGA**  
**TTCTACAATACTAGCTTTTATGGTTATGAAGAGGAAAAATTGGCAGTAACCTGGCCCCACAAACCTTCAAATGAACGAATCAAATTAACAACCATAGG**  
**ATGATAATGCGATTAGTTTTTTAGCCTTATTTCTGGGGTAATTAATCAGCGAAGCGATGATTTTTGATCTATTAAACAGATATATAAATGCAAAAAC**  
**CATAACCACTTTAACTAATCTTTCAACATTTTCGGTTTGTATTACTTCTTATTCAATGTAATAAAAGTATCAACAAAAAATGTTAATATACCTCT**  
**ATACTTTAACGTCGAAGGAGAAAAACCCCGCGCCAAATTATCTACTTAAGGCCTAAACATACCAGATCGCCACCCGCGCTTAAATCTGGAGAGGTGA**  
**AGAATACGACCACCTAGGCCCTTAAGAACCGGTAAACATACCAGATCGCCACCCGCGCTTAAATCTGGAGAGGTGAAGAATACGACCACCTACCGGTC**  
**AAACAACAACAACAACAACAACAACCTCGAGGCTTAAACATACCAGATCGCCACCCGCGCTTAAATCTGGAGAGGTGAAGAATACGACCACCTAGG**  
**CCTCGAGAACATATCTACCCATACGAGATCTATGcagattttcgtaagactttgaccggtaaaaccataacattggaagttgaatcttccgatacca**  
**tcgacaacgtaagtcgaaaattcaagacaaggaaggtatccctccagatcaacaaagattgatctttgccggaagcagctagaagacggtagaacg**  
**ctgtctgattacaacattcagaaggagtcacacttctgtgctaaggetaagaggtggt****AGGCACGGATCC****TACCCATACGACGTCCAGACTA**  
**CGCTAAAGCTTCCGGGGGATGTCGGATATCAACGAAAACTCCCAAGGATTACTACAAGACGCTGCTTGAAAGCATCTGTTCCCTATTCCAGATGACT**  
**TCGTTAAGGTTCAAGGTATTGATTACTCAAAGCCTGAAGCCACTAATATGAGAGCAACTGATTTAATTGAAGCTATGAAGGTACCcgcatCTTTCTAG**  
AAGATCTCCTACAATATTCTCAGCTGCCATGGAATAATCGATGTTCTCTTTTATTCTCTCAAGATTTTCAGGCTGTATATTAAACTTATATTAAAGAA  
CTATGCTAACACCTCATCAGGAACCGTTGTAGGTGGCGTGGGTTTTCTTGGCAATCGACTCTCATGAAACTACGAGCTAAATATTCAATATGTTCC  
TCTTGACCACTTTATCTGCATTTTTTTTGAACGAGGTTTAGAGCAAGCTTCAGGAACTGAGACAGGAATTTTATTAAAAATTTAAATTTTGAAGA  
AAGTTCAGGGTTAATAGCATCCATTTTTTGTCTTGGCAAGTTCTCAGCATTTCTTAAACAAAGACGCTCTCTTTTGACATGTTTAAAGTTTAAACCTCT  
GTGTGAAATTTGTATCCGCTCACAAATCCACACATTATACGAGCCGAAGCATAAAGTGTAAGCCTGGGGTGCCTAATGAGTGAGCTAACTCACATT  
AATTGCGTTGCGCTCACTGCCAATTGCTTTTCAGTCCGGAAACCTGTGTCGAGCTGCATTAAATGAATCGGCCAACGCGCGGGGAGAGGCGGTTTGC  
GTATTGGGCGCTCTTCCGCTTCCTCGCTCACTGACTCGCTCGCTCGGTCGGTTCGGCTGCGGCGAGCGGTATCAGCTCACTCAAAGCGGTAATACGG  
TTATCCACAGATAACGGGATAACGACGGAAGAACAATGTGAGCAAAAGGCCAGCAAAAGGCCAGGAACCGTAAAAAGGCGCGTTGCTGGCGTTTTT  
CCATAGGCTCCGCCCCCTGACGAGCATCACAAAAATCGACGCTCAAGTCAGAGTGGCGAAACCCGACAGGACTATAAAAGATACCAGGCGTTTCCCC  
CTGGAAGCTCCCTCGTGGCTCTCCTGTTCCGACCTGCGGCTTACCGGATACCTGTCCGCTTTCTCCCTTCCGGAAGCGTGGCGCTTTCTCATAGC  
TCACGCTGTAGGTATCTCAGTTCCGTTGAGTTCGTTCCGCTCCAAGCTGGGCTGTGTGCACGAACCCCGTTAGCCCGACCGCTGCGCTTATCCGG  
TAACTATCGTCTTGAGTCCAACCCGGTAAGACACGACTTATCGCCACTGGCAGCAGCCACTGGTAACAGGATTAGCAGAGCGAGGTATGTAGGCGGTG  
CTACAGAGTTCTTGAAGTGGTGGCTTAACCTACGGCTACACTAGAAGGACAGTATTTGGTATCTGCGCTCTGCTGAAGCCAGTTACCTTCGGAATAAAGA  
GTTGGTAGCTCTTGATCCGGCAAAACAAACACCGCTGGTAGCGGTGGTTTTTTTTTGTGTTGCAAGCAGCAGATTACGCGCAGAAAAAAGGATCTCAAGA  
AGATCCTTTGATCTTTTCTACGGGCTCTGACGCTCAGTGAACGAAAACTCAGGTTAAGGATTTTGGTCATGAGATTATCAAAAAGGATCTTCACCT  
AGATCCTTTTAAATTAATAATGAAGTTTAAATCAATCTAAAGTATATATGAGTAACTTGGTCTGACAGTTACCAATGCTTAAATCAGTGAGGCACCT  
ATCTCAGCGATCTGTCTATTTCGTTTATCCATAGTTGCCCTGACTCCCGTCGTGTAGATAACTACGATACGGGAGGGCTTACCATCTGGCCCCAGTGC  
TGCAATGATAACCGCGAGACCCACGCTCACCGGCTCCAGATTTATCAGCAATAAACACGAGCCAGCCGGAAGGGCCGAGCGCAGAAGTGGTCTGCAACT  
TATCCGCTCCATCCAGTCTATTAATTGTTGCGGGGAAGCTAGAGTAAGTAGTTCGCCAGTTAATAGTTTGCACAACGTTGTTGCCATTGCTACAGGC  
ATCGTGGTGTACGCTCGTCTGTTGGTATGGCTTCATTCACTCAGCTCCGTTCCCAACGATCAAGGCGAGTTACATGATCCCCATGTTGTGCAAAAAAGC  
GGTTAGCTCCTTCGGTCTCCGATCGTTGTGAGAAAGTGGCCGAGTGTATCACTCATGTTTATGGCAGCACTGCATAATTCTCTTACTGTCTCA  
TGCCATCCGTAAGATGCTTTTCTGTGACTGGTGAGTACTCAACCAAGTCATTCTGAGAATAGTGTATGCGGCGACCGAGTTGCTCTTGGCCGGCGTCA  
ATACGGGATAATACCGGCCCATAGCAGAACTTTAAAAGTGCTCATCATTGAAAAACGTTCTTCGGGGCGAAAACTCTCAAGGATCTTACCGCTGTT  
GAGATCCAGTTCGATGTAACCCACTCGTGCACCCAACTGATCTTCAGCATCTTTTACTTTTACCAGCGTTTCTGGGTGAGCAAAAAACAGGAAGGCAAA  
ATGCCGCAAAAAAGGGAATAAGGGCGACACGAAATGTTGAATACTATACCTTTCTTTTCAATATTATTGAAGCATTTATCAGGGTTATTGTCTC  
ATGAGCGGATACATATTGAATGTATTAGAAAAATAACAAATAGGGGTTCCGCGCACATTTCCCCGAAAAGTGCCACCTGACGCTTAAGAAACCAT  
TATTATCATGACATTAACCTATAAAAAATAGGCGTATCACGAGGCC

**pKH14** [pJET1.2-**P<sub>Dys1</sub>**-**P<sub>TEF</sub>**-**his5**-**T<sub>TEF</sub>**-**P<sub>GAL</sub>**-**tc3**-**HA**-**ORF<sub>Dys1</sub>**]

CCCCCTGCAGCCGAATTATATTATTTTGGCCAAATAATTTTTAAACAAAAGCTCTGAAGTCTTCTTCATTAAATCTTAGATGATACTTCATCTGGAA  
AATTGTCCCAATTAGTAGCATCAGCGTGTGAGTAAGTTCTAAACCATTTTTTTATTGTTGTATTATCTCTAATCTTACTACTCGATGAGTTTTCGGTA  
TTATCTCTATTTTTAACTTGGAGCAGGTTCCATTTCATGTTTTTTTCATCATAGTGAATAAAATCAACTGCTTTAACTTGTGCTGAACACCATAT  
CCATCCGGCGTAATACGACTCACTATAGGGAGAGCGGCCCGCAGATCTCCGGATGGCTCGAGTTTTTCAGCAAGATGCATGCGGC**CGCATTACGGGA**  
**AGAACTGAAAAAAGGTGGGAAAAAATAAAAGTAAAGTGAAAAAATAATGTAATGTATATTTCCATTTTGACGCAAAGTACTTCCCTCTATCA**  
**GTTTTGTATCTAACTGCAGAGTAAAGTCGTGTTTTGCTTAGTTAAC**GAATTCGTTTAGCTTGCCCTCGTCCCGCCGGGTACCCCGGCCAGCGACATGG  
AGGCCAGAATACCTCCTTGACAGTCTTGACGTGCGCAGCTCAGGGGCATGATGTGACTGTGCGCCGTACATTTAGCCCATACATCCCCATGTATAA  
TCATTTGCATCCATACATTTTGATGGCCGCACGGCGGAAGCAAAAATTACGGCTCCTCGCTGCAGACCTGCGAGCAGGGAACCGCTCCCTCACAGA  
CGCGTTGAATGTCCCCACGCCGCCCTGTAGAGAAATATAAAAGGTTAGGATTTGCCACTGAGGTTCTTCTTTCATATACTTCCTTTTAAATCT  
TGCTAGGATACAGTTCTCACATCACATCCGAACATAAACACCC**ATGGGTAGGAGGGCTTTTGTAAGAAATAACGAACGAAACGAAATCAGCGTTG**  
**CCATCGCTTTGGACAAAGCTCCCTTACCTGAAGAGTCGAATTTTATTGATGAACCTTAACCTTCCAAGCATGCAAAACCAAAAGGGAGAACAAAGTAAT**  
**CAAGTAGACACGGGAATTGGATTCTTGGATCACATGTATCATGCACCTGGCTAAACATGCAGGCTGGAGCTTACGACTTTACTCAAGAGGTGATTTAAT**  
**CATCGATGATCATCACTGCAGAAGATACCTGCTATTGCACCTGGTATTGCATTCAAGCAGGCTATGGGTAACCTTGCCGGCGCTTAAAGATTGGAC**  
**ATGCTTATTGTCACCTTGACGAAGCTCTTCTAGAAGCGTAGTTGACTTGTGCGGACGGCCCTATGCTGTTATCGATTTGGGATTAAAGCGTGAAG**  
**GTGGGGAATTGTCCTGTGAAATGATCCCTCACTTACTATATTCCTTTTCGGTAGCAGCTGGAATTACTTTGCATGTTACCTGCTTATATGGTAGTA**  
**TGACCATCATCGTGCCTGAAAGCGCTTTTAAATCTCTGCGCTGTGCCATGCGCGCGGCTACTAGTCTTACTGGAAGTTCTGAAGTCCCAAGCACGAAG**  
**GAGTGTGTAA**AGAGTACTGACAATAAAAAGATTCTTGTTCCTCAAGAACTTGTCAATTTGTATAGTTTTTTTATATTGTAGTTGTCTATTTTAAATCAA  
ATGTTAGCGTGATTTATATTTTTTTTCGCCTCGACATCATCTGCCAGATGCGAAGTTAAGTGCAGAAAGTAATATCATGCGTCAATCGTATGTGA  
ATGCTGGTTCGTATACTGCTGTCGATTTCGATACTAACGCCGCCATCCAgtttaaac**GAGCTCT**AGTACGGATTAGAAGCCCGGAGCGGGTGACAGCC  
CTCCGAAGGAAGACTCTCCTCGGTGCGTCTCGCTTCCACGGTCGCGTTCCTGAAAACGCAGATGTGCTCGCGCCGCACTGCTCCGAACAATAAG  
TTCTACAATACTAGCTTTTATGGTTATGAAGAGGAAAAATTGGCAGTAACCTGGCCCCACAACCTTCAAATGAACGAATCAAATTAACAACCATAGG  
ATGATAATGCGATTAGTTTTTTAGCCTTATTTCTGGGGTAATTAATCAGCGAAGCGATGATTTTTGATCTATTAAACAGATATATAAATGCAAAAAC**TG**  
CATAACCACTTTAACTAATACCTTTCAACATTTTCGGTTTGTATTACTTCTTATTCAATGTAATAAAAGTATCAACAAAAAATTGTTAATATACCTCT  
ATACTTTAACGTCAAGGAGAAAAA**CCCGCGCCCAATTATCTACTTAAGGCCTAAAACATACCAGATCGCCACCCCGCGCTTAAATCTGGAGAGGTGA**  
AGAATACGACCACCTAGGCCTTAAGAACCGGTAAAAACATACCAGATCGCCACCCGCGCTTAAATCTGGAGAGGTGAAGAATACGACCACCTACCGGTC  
AAACAACAACAACAACAACAACAACCTCGAGGCCTAAAACATACCAGATCGCCACCCGCGCTTAAATCTGGAGAGGTGAAGAATA**CGACCACCTAGG**  
CCTCGAGAACATATCTACCCATACGAGATCTATGCACGGATCC**TACCCATACGACGTCACGACTAC**GCTAAAGCTTCCGGGG**ATGTCCGATATCAA**  
**CGAAAACTCCAGAGTTACTACAAGACGCTGTCTTGAAAGCATCTGTTCCTATTCCAGATGACTTCGTTAAGGTTCAAGGTATTGATTACTCAAAGC**  
**CTGAAGCCACTAATATGAGAGCAACTGATTTAATTGAAGCTATGAAG****GTACC**gcATCTTCTAGAAGATCTCTACAATATTCTCAGCTGCCATGGA  
AAATCGATGTTCTTCTTTATTTCTCTCAAGATTTTCAGGCTGTATATTAAACTTATATTAAGAACTATGCTAACCACTCATCAGGAACCGTTGTAG  
GTGGCGTGGGTTTTCTTGGCAATCGACTCTCATGAAAACCTACGAGCTAAATATTCAATATGTTCCCTCTGACCAACTTTATTTCTGCATTTTTTTTGAA  
CGAGGTTTAGAGCAAGCTTCAGGAACTGAGACAGGAATTTTATTAATAATTTAAATTTTGAAGAAAGTTCAGGGTTAATAGATCCATTTTTTGTCTT  
TGCAAGTTCCTCAGCATCTTAAACAAAAGACGTCTCTTTTGACATGTTTAAAGTTTAAACCTCCTGTGTGAAATTTGTTATCCGCTCACAAATCCACAC  
ATTATACGAGCCGGAAGCATAAAGTGTAAGCCCTGGGGTGCTTAATGAGTGAGCTAACTCACATTAATGCGTTGCGCTCACTGCCAATGCTCTTCCA  
GTCGGGAAACCTGTCTGTCCGAGTGCATTAATGAATCGGCCAACGCCGGGAGAGGCGGTTTGCATATTGGGCGCTCTTCCGCTTCTCTCGCTCACTG  
ACTCGCTGCGCTCGGTCTGCTCGGCTGCGGCGAGCGGTATCAGCTCACTCAAAGGCGGTAATACGGTTATCCACAGAATCAGGGGATAACGCAGGAAAG  
AACATGTGAGCAAAAGGCCAGCAAAAGGCCAGGAACCGTAAAAAGGCCGCGTTGCTGGCGTTTTTCCATAGGCTCCGCCCCCTGACGAGCATCACAA  
AAATCGACGCTCAAGTCAGAGGTGGCGAAACCCGACAGGACTATAAAGATACCAGGCGTTTTCCCCCTGGAAGCTCCCTCGTGCCTCTCCTGTTCCGA  
CCCTGCGCTTACCGGATACCTGTCCGCTTTCTCCCTTCGGGAAGCGTGCGCTTTTCTCATAGCTCAGCTGATAGGTATCTCAGTTCCGTTGTTAGGTC  
GTTCTGCTCAAAGCTGGGCTGTGTGCACGAACCCCGCTTACGCCGACCGCTGCGCTTATCCGGTAACATCGTCTTGAGTCCAACCCGGTAAGACA  
CGACTTATCGCCACTGGCAGCAGCCACTGGTAACAGGATTAGCAGAGCGAGGTATGTAGGCGGTGCTACAGAGTTCTTGAAGTGGTGGCCTAACTACG  
GCTACACTAGAAGGACAGTATTGTGATCTGCGCTCTGCTGAAGCCAGTTACCTTCGGAAAAAGAGTTGGTAGCTCTTGATCCGGCAACAAACCAACC  
GCTGGTAGCGGTGGTTTTTTTGTGTTGCAAGCAGCAGATTACGCGCAGAAAAAAGGATCTCAAGAAGATCCTTTGATCTTTTCTACGGGGCTGACGC  
TCAGTGAACGAAAACTCAGTTAAGGGATTTTGGTCATGAGATTATCAAAAAGGATCTTCACTAGATCCTTTTAAATTAATAAAGTGTAAAT  
CAATCTAAAGTATATATAGTAAACTTGGTCTGACAGTTACCAATGCTTAATCAGTGAGGCACCTATCTCAGCGATCTGTCTATTTCTGTTTATCCATA  
GTTGCTGACTCCCCGTGCTGTAGATAACTACGATACGGAGGGCTTACCATCTGCCCCAGTGCTGCAATGATACCGCGAGACCCACGCTCACCAGG  
TCCAGATTTATCAGCAATAAACAGCCAGCCGGAAGGGCCGAGCGCAGAAGTGGTCCGCAACTTTATCCGCTCCATCCAGTCTATTAATTGTGTC  
GGGAAGCTAGAGTAAGTAGTTCCGCACTTAATAGTTTGCGCAACGTTGTTGCCATTGCTACAGGCATCGTGGTGTACGCTCGTCTGTTGGTATGGCT  
TCATTACGCTCCGGTTCCCAACGATCAAGGCGAGTTACATGATCCCCATGTTGTGCAAAAAGCGGTTAGTCTCCTTCGGTCTCCGATCGTTGTCTAG  
AAGTAAGTTGGCCGAGTGTATCACTCATGGTTATGGCAGCACTGCATAATTCTCTTACTGTATGCCATCCGTAAGATGCTTTTCTGTGACTGGTG  
AGTACTCAACCAAGTCACTCTGAGAATAGTGATGCGGCGACCGAGTTGCTCTTGCCGGCGTCAATACGGGATAATACCGGCCACATAGCAGAACT  
TTAAAGTGCTCATCATTTGGAAAACGTTCTTCGGGGCGAAAACCTCTCAAGGATCTTACCGCTGTTGAGATCCAGTTCGATGTAAACCACTCGTGCACC  
CAACTGATCTTCAGCATCTTTTACTTTTACCAGCGTTTCTGGGTGAGCAAAAACAGGAAGGCAAAATGCCGCAAAAAGGGAATAAGGGCGACACGGA  
AATGTTGAATACTCACTCTTCTTTTCAATATTATTGAAGCATTATCAGGGTTATTGCTCATGAGCGGATACATATTTGAATGTATTTAGAAA  
AATAAACAAATAGGGGTTCCGCGCACATTTCCCCGAAAAGTGCCACCTGACGCTCAAGAAACCATTAATTATCATGACATTAACCTATAAAAATAGGCG  
TATCAGGAGGC

**pKH15** [pUC19-**P<sub>HYP2</sub>**-**P<sub>TEF</sub>**-**his5**-**T<sub>TEF</sub>**-**P<sub>GAL1</sub>**-**tc3**-**Ub**-**R**-**HA**-**ORF<sub>HYP2</sub>**-**T<sub>HYP2</sub>**]

TCGCGCGTTCGGTGATGACGGTGAAAACCTCTGACACATGCAGCTCCCGGAGACGGTCACAGCTTGCTGTGAAGCGGATGCCGGGAGCAGACAAGCC  
CGTCAGGGCGCGTCAGCGGGTGTGGCGGGTGTGGGGCTGGCTTAACTATGCGGCATCAGAGCAGATTGTACTGAGAGTGCACCATATGCGGTGTGA  
AATACGCGACAGATGCGTAAGGAGAAAATACGCGCATCAGGCGCCATTGCGCCATTGAGCTGCGCAACTGTTGGGAAGGGCGATCGGTGCGGGCCTCTT  
CGCTATTACGCCAGCTGGCGAAAGGGGGATGTGCTGCAAGGCGATTAAAGTTGGGTAACGCCAGGGTTTCCCAGTCACGACGTTGTAACACGACGGCC  
AGTGAATTCCTGACCATTGGCTTCGTTCTGGTGGCATTTCCTCTGAGGGGTGAGAACAGCAAAACGGGAACGGCGACTTGGAGTAGTATAACGCTGT  
AGCTGGACGCTGAGGGGCCAAGGCCGGTAAAAATTCTGCAACACCCAGACCTTGTCTGCAGTGATATCATCCACCATAACCCCTCGATGTATTCCGTAGC  
GTTATATCGGGTCCGTGTGAGGCGACAAGGGACCTCCCGCACCCGCACATACCCGAGGAGCTAAAAGAAACGCCGTCGCCCGAAAAAAGTTTCGAAGG  
TGAAGGAACAGTGGTAATAAAAAATTTTTCGTCGTCGTCGTCGATCGGCTTTTGGCCGCGTGTATCGTCGTCGTTCACGATTATATAATGCACAAGG  
TTTTTGCCATATCTTGACATTGGAATCCCTCATTTCCATAAATTCCTCTCCTTCTATCAATTGCTTCCTTTCCCTTCTTCTTAACGATTCTACTTCTaga  
tctGTTTAGCTTGCCTCGTCGCCCGCGGGTCACCCGGCCAGCGACATGGAGGGCCAGAATACCCTCCTTGACAGTCTTGACGTGCGCAGCTCAGGGGC  
ATGATGTGACTGTGCGCCGTACATTTAGCCCATACATCCCCATGTAATAATCATTTTGATCCATACATTTTGATGGCCGCACGGCGCAGCAAAAAATT  
ACGGCTCCTCGCTGCAGACCTGCGAGCAGGGAACGCTCCCTCACAGACGCGTTGAATTGTCCCCACGCCGCGCCCTGTAGAGAAATATAAAAGGT  
TAGGATTTGCCACTGAGGTTCTCTTTCATATACTTCTTTTAAAACTTGTGTAGGATACAGTTCTCACATCACATCCGAACATAAAACACCATGGGT  
AGGAGGGCTTTTGTAGAAAAGAAATACGAACGAAACGAAAATCAGCGTTGCCATCGCTTTGGACAAAGCTCCCTTACCTGAAGAGTCGAATTTTATTGA  
TGAACCTATAACTTCCAAGCATGCAAAACCAAAAGGGAGAACAAGTAATCCAAGTAGACACGGGAATTGGATTCTTGGATCACATGTATCATGCACCTGG  
CTAAACATGCAGGCTGGAGCTTACGACTTTACTCAAGAGGTGATTTAATCAFCGATGATCATCACACTGCAGAAAGATACCTGCTATTGCACTTGGTATT  
GCATTCAAGCAGGCTATGGGTAACTTTGCCGGCGTTAAAAGATTGGACATGCTTATTGTCCACTTGACGAAGCTCTTTCTAGAAGCGTAGTTGACTTT  
GTCGGGACGGCCCTATGCTGTATCGATTGGGATTAAGCGGTGAAAAGGTTGGGGAATTGTCTGTGAAATGATCCCTCACCTACTATATTCTCTTT  
CGGTGAGCAGCTGGAATTACTTTGCATGTTACCTGCTTATAGGTAGTAATGACCATTGACCATCGTGCTGAAAAGCGCTTTTAAATCTCTGGCTGTTGCCATC  
CGCGCGCTACTAGTCTTACTGAGTCTTCTGAACTCCAAGCAGGAAGGAGTGTGTAAAGAGTACTGCACAATAAAAAGATTCTTGTTTTCAAGAAC  
TTGTCAATTTGTATAGTTTTTTTATATTGTAGTTGTTCTATTTTAATCAAATGTTAGCGTGATTATATTTTTTTTCGCCTCGACATCATCTGCCAGA  
TGCGAAGTTAAGTGCAGAGAAAGTAATATCATGCGTCAATCGTATGTGAATGCTGGTCGCTATACTGCTGTGCGATTGATACCTAACGCCGCCATCCAg  
tttaaacGAGCTCTAGTACGGATTAGAAGCCGCCGAGCGGGTGACAGCCCTCGGAAGGAAGACTCTCCTCCGTGCGTCTCTGCTTACCCGGTGCAGT  
TCCTGAAACGCAGATGTGCCTCGCGCCGCACTGCTCCGAACAATAAAGATTCTACAATACTAGCTTTTATGGTTATGAAGAGGAAAAATTGGCAGTAA  
CCTGGCCCCACAACCTTCAAATGAACGAATCAAATTAACAACCATAGGATGATAATGCGATTAGTTTTTTAGCCCTTATTTCTGGGGTAATTAATCAG  
CGAAGCGATGATTTTGTATCTATTAAACAGATATATAAATGCAAAAACCTGCATAACCCTTTAACTAATACTTTCAACATTTTCGGTTTGTATTACTTC  
TTATTCAAATGTAATAAAAGTATCAACAAAAAATTGTTAATATACCTCTATACTTTAAACGTCAAGGAGAAAAAACCCCGCGGCCAATTATCTACTTAA  
GGCCTAAAACATACCAGATCGCCACCCGCGCTTTAATCTGGAGAGGTGAAGAATACGACCACCTACGGCTTAAAGAACCGGTAAAACATACCAGATCGC  
CACCCGCGCTTAACTCGAGAGGTGAAGAATACGACCACCTACCGGTCAACAACAACAACAACAACAACAACAACAACAACAACAACAACAACAACA  
TCGCCACCCGCGCTTAACTCGAGAGGTGAAGAATACGACCACCTACCGGTCAACAACAACAACAACAACAACAACAACAACAACAACAACAACAACA  
actttgaccggtataaacataacattggaagtgaatcttccgataccatcgacaacggttaagtgcgaattcaagacaagggaaggatccctccaga  
tcaacaaagattgatctttgccggtgaagcagctagaagacggtagaacgctgtctgattacaacattcagaaggagtcacacttacatcttgctgttaa  
ggctaagaggtggtAGGCACGGATCCTACCCATACGACGCTCCAGACTACGGTAAAGCTTCCGGGGGATGTCTGACGAAGAACATACCTTTGAAACT  
GCTGACGCTGCTTCCCTCCGCCACCTACCCAATGCAATGTTCTGCTTGAAGAAGACGGTTTCGTTGTCATCAAGAGTAGACCATGTAAGATTCTCGA  
CATGTGCACTTCTAAGACTGCTAAGCAGGTCACGCTAAAGTCCATTGGTTGGCTTGTATATCTTCACTGGTAAGAAGTTGGAAGATTGTCTCCAT  
CTACTCAACAATGGAAGTTCAGTTGTCAAGAGAAACGAATACCAATTGTTGGACATTGATGACGGTTTCTTGTCTTTGATGAACATGGACGGTGAC  
ACTAAGGATGATGTCAAGGCTCCAGAGGTGAATTGGGTGACAGTTTGCAAACTGCTTTTGTGTAAGGTAAGGACTTGATGGTTACCATCATCTCCGC  
TATGGGTGAAGAAGCCGCATCTCCTTCAAGGAAGCTGTCTAGAACCATTAAACCGGTTAACATCATGGCATGGGATATAAATGAAAAAAGAAAAAA  
AATCCGACGCGCCCTTCCATCATCATGTACTCTTCCGTGAACGGGCTCGAGGGGGGCCCGGTACCCGGGGATCCTCTAGAGTCACTGACCTCAGGC  
ATGCAAGCTTTGGCGTAATCATGGTCTATAGCTGTTTCTGTGTAATGTTTATTCGCTCACAAATTCACACAACATCAGAGCGGAAGCATAAAGGTG  
AAAGCCTGGGGTGCCATATGAGTGAGCTAACTCACATTAATTGCGTTGCGCTCACTGCCCGCTTCCAGTCGGGAAACCTGTGCTGCCAGCTGCATTA  
ATGAATCGGCCAACCGCGCGGGGAGAGCGGTTTGCGTATTGGGCGCTTCTCCGCTTCCCTCGCTCACTGACTCGCTGCGCTCGGTGCTTCCGCTCGGC  
GAGCGGTATCAGCTCACTCAAGGCGGTAATACGGTTATCCACAGAATCAGGGGATAACGCAGGAAAGAACATGTGAGCAAAAGGCCAGCAAAAGGCC  
AGGAACCGTAAAAAGGCCGCTTGTGCGCTTTTCCATAGGCTCCGCCCTTACGAGCATCACAAAAATCGACGCTCAAGTCAGAGGTGGCGAAA  
CCCGACAGGACTATAAAGATACCAGGCGTTTCCCCCTGGAAGCTCCCTCGTGCCTCTCCTGTTCCGACCCTGCCGCTTACCGGATACCTGTCCGCT  
TTCTCCCTTCGGGAAGCGTGCGCTTTTCTCATAGCTACGCTGTAGGTATCTCAGTTCCGGTGTAGGTGCTTCCGCTCCAGCTGGGCTGTGTGCAGGAA  
CCCCCGTTACGCCGACCGCTGCGCTTATCCGGTAACATATCGTCTTGAGTCCAACCGGTAAAGACACGACTTATCGCCACTGGCAGCAGCCACTGG  
TAACAGGATTAGCAGAGCGAGGTATGTAGGCGGTGTACAGAGTCTTGAAGTGGTGGCCTAACTACGGCTACACTAGAAGAACAGTATTTGGTATCT  
GCGCTCTGCTGAAGCCAGTTACCTTCGAAAAAGAGTTGGTAGCTCTTGATCCGGCAACAACCAACCGCTGGTAGCGGTGGTTTTTTTGTGTTTGAAG  
CAGCAGATTACGCGCAGAAAAAAGGATCTCAAGAAGATCCTTGATCTTTTCTACGGGCTCTGACGCTCAGTGAACGAAAACTCACGTTAAGGGAT  
TTTGGTCATGAGATTATCAAAAGGATCTTACCTAGATCCTTTTAAATTAATAAATGAAGTTTAAATCAATCTAAAGTATATATGAGTAACTTGGT  
CTGACAGTTACCAATGCTTAATCAGTGAGGCACCTATCTCAGCGATCTGTCTATTTTCGTTTATCCATAGTTGCGTGACTCCCGCTCGGTAGATAACT  
ACGATACGGGAGGGCTTACCATCTGGCCCCAGTGCTGCAATGATACCGCGAGACCCACGCTCACCGGCTCCAGATTTATCAGCAATAAACACGCGAGC  
CGGAAGGGCCGAGCGCAGAAAGTGGTCTGCAACTTTATCCGCTCCATCCAGTCTATTAATTGTTGGCGGAAGCTAGAGTAAGTAGTTCCGCCAGTTA  
ATAGTTTGGCGAACGTTGTTGCCATTGCTACAGGCATCGTGGTGTACGCTCGTCTGTTGGTATGGCTTCATTCAGCTCCGGTTCCCAACGATCAAGG  
CGAGTTACATGATCCCCATGTTGTGCAAAAAGCGGTTAGCTCCTTCGGTCTCCGATCGTTGTGAGAAGTAAGTTGGCCGAGGTGTTATCACTCAT  
GGTTATGGCAGCACTGCATAATTCTCTTACTGTGTCATGCCATCCGTAAGATGCTTTTCTGTGACTGGTGAGTACTCAACCAAGTCATTCTGAGAATAGT  
GTATGCGGCGACCGAGTTGCTCTTGCCCGCGTCAATACGGGATAATACCGCGCCACATAGCAGAACTTTAAAGTGCTCATCATTTGAAAAACGTTCT  
TCGGGGCGAAAACTCTCAAGGATCTTACCGCTGTTGAGATCCAGTTCGATGTAACCCACTCGTGACCCCACTGAGCATCTTTTCACTTTTAC  
CAGCGTTTCTGGGTGAGCAAAAACAGGAAGGCAAAATGCCGCAAAAAGGGAATAAGGGCGACACGGAAATGTTGAATACTCATACTCTTCTTTTTC  
AATATTATTGAAGCATTTATCAGGGTTATTGTCTCATGAGCGGATACATATTTGAATGTATTTAGAAAAATAAACAAATAGGGGTTCCGCGCACATTT  
CCCCGAAAAGTGCCACCTGACGTCTAAGAAACCATTTATTATCATGACATTAACCTATAAAAAATAGGCGTATCAGGAGCCCTTTCGTC

**pKH16** [pUC19-P<sub>HYP2</sub>-P<sub>TEF</sub>-*his5*-T<sub>TEF</sub>-P<sub>GAL1</sub>-tc3-HA-ORF<sub>HYP2</sub>-T<sub>HYP2</sub>]

[illegible]



**Table S1: Quantification of anti-Myc western blot signals of blot shown in Fig. 4**

| Strain             | Band(s)     | Signal   | %      | % RFS | Mean  | SD   | T-test<br>vs. WT (p) |
|--------------------|-------------|----------|--------|-------|-------|------|----------------------|
| <b>Wild type 1</b> | Full-length | 1391147  | 14,47  | 14,47 | 14.48 | 0,47 |                      |
|                    | truncated   | 8222782  | 85,53  |       |       |      |                      |
|                    | Total       | 9613929  | 100,00 |       |       |      |                      |
| <b>Wild type 2</b> | truncated   | 1395516  | 14,01  | 14,01 | 14.48 | 0,47 |                      |
|                    | Full-length | 8565407  | 85,99  |       |       |      |                      |
|                    | Total       | 9960923  | 100,00 |       |       |      |                      |
| <b>Wild type 3</b> | truncated   | 1518780  | 14,95  | 14,95 |       |      |                      |
|                    | Full-length | 8642364  | 85.05  |       |       |      |                      |
|                    | Total       | 10161144 | 100,00 |       |       |      |                      |
| <b>DYS1 -SD 1</b>  | Full-length | 434763   | 4,91   | 4,91  |       |      |                      |
|                    | truncated   | 8416616  | 95,09  |       |       |      |                      |
|                    | Total       | 8851379  | 100,00 |       |       |      |                      |
| <b>DYS1 -SD 2</b>  | truncated   | 508256   | 5,42   | 5,42  | 5,27  | 0,32 | 0,0000296            |
|                    | Full-length | 8860794  | 96,58  |       |       |      |                      |
|                    | Total       | 9369050  | 100,00 |       |       |      |                      |
| <b>DYS1 -SD 3</b>  | truncated   | 478043   | 5,49   | 5,49  |       |      |                      |
|                    | Full-length | 8222782  | 94,51  |       |       |      |                      |
|                    | Total       | 8700825  | 100,00 |       |       |      |                      |
| <b>HYP2 -SD 1</b>  | Full-length | 256957   | 4,42   | 4,42  |       |      |                      |
|                    | truncated   | 5551927  | 95,58  |       |       |      |                      |
|                    | Total       | 5808884  | 100,00 |       |       |      |                      |
| <b>HYP2 -SD 2</b>  | truncated   | 433732   | 5,46   | 5,46  | 5,08  | 0,57 | 0,0000337            |
|                    | Full-length | 7504955  | 94,54  |       |       |      |                      |
|                    | Total       | 7938687  | 100,00 |       |       |      |                      |
| <b>HYP2 -SD 3</b>  | truncated   | 430305   | 5,35   | 5,35  |       |      |                      |
|                    | Full-length | 7611366  | 94.65  |       |       |      |                      |
|                    | Total       | 8041671  | 100,00 |       |       |      |                      |

**Table S2 – *S. cerevisiae* strains used in this study**

| Strain*              | Relevant Genotype                                                                              | Source / Reference |
|----------------------|------------------------------------------------------------------------------------------------|--------------------|
| WCG4a or - $\alpha$  | <i>his3-11,15, leu2-3,112, ura3-52</i>                                                         | [63]               |
| KH27-1B,-5C,-9C**    | <i>hyp1<math>\Delta</math>::KanMX6, pKH16::His3MX6 (in HYP2), pFO1::URA3, LEU2, his3-11,15</i> | This work          |
| KH29-3A              | <i>hyp1<math>\Delta</math>::KanMX6, pKH16::His3MX6 (in HYP2), pFO2::URA3, LEU2, his3-11,15</i> | This work          |
| KH29-2B              | <i>hyp1<math>\Delta</math>::KanMX6, pKH16::His3MX6 (in HYP2), LEU2, his3-11, ura3-52</i>       | This work          |
| KH32-10D,-11D,-11B** | <i>hyp1<math>\Delta</math>::KanMX6, pKH13::His3MX6 (in DYS1), pFO2::URA3, LEU2, his3-11,15</i> | This work          |
| KH33-4C,-5D,-9B**    | <i>hyp1<math>\Delta</math>::KanMX6, pKH13::His3MX6 (in DYS1), pFO1::URA3, LEU2, his3-11,15</i> | This work          |
| KH30                 | <i>hyp1<math>\Delta</math>::KanMX6, pFO2::URA3, LEU2, HIS3</i>                                 | This work          |
| KH31                 | <i>hyp1<math>\Delta</math>::KanMX6, pFO1::URA3, LEU2, HIS3</i>                                 | This work          |
| JD411-1A,4B**        | <i>pFO1::URA3, LEU2, HIS3</i>                                                                  | This work          |
| JD403-12C            | <i>pFO2::URA3, LEU2, HIS3</i>                                                                  | This work          |

\*All strains are congenic derivatives of WCG4a or WCG4- $\alpha$

\*\*Congenic spore clones obtained by tetrad dissection

**Table S3 – Plasmids used in this study**

| Name         | Relevant characteristics                                                                                        | Derivative of / reference |
|--------------|-----------------------------------------------------------------------------------------------------------------|---------------------------|
| pKH11        | <i>P<sub>HYP2</sub>-HYP2, CEN/LEU2</i>                                                                          | pRS315                    |
| pKH12        | <i>P<sub>HYP2</sub>-HA-HYP2, CEN/LEU2</i>                                                                       | pRS315                    |
| pKH18        | <i>P<sub>HYP2</sub>-hyp2<sup>K51R</sup>, CEN/LEU2</i>                                                           | pRS315                    |
| pKH13        | <i>5' <math>\Delta</math>-P<sub>DYS1</sub>-His3MX6-P<sub>GAL1-tc3</sub>-Ub-R-HA-DYS1-3' <math>\Delta</math></i> | pJET1.2                   |
| pKH14        | <i>5' <math>\Delta</math>-P<sub>DYS1</sub>-His3MX6-P<sub>GAL1-tc3</sub>-HA-DYS1-3' <math>\Delta</math></i>      | pJET1.2                   |
| pKH15        | <i>5' <math>\Delta</math>-P<sub>HYP2</sub>-His3MX6-P<sub>GAL1-tc3</sub>-Ub-R-HA-HYP2-T<sub>HYP2</sub></i>       | pUC19                     |
| pKH16        | <i>5' <math>\Delta</math>-P<sub>HYP2</sub>-His3MX6-P<sub>GAL1-tc3</sub>-HA-HYP2-T<sub>HYP2</sub></i>            | pUC21                     |
| pFO1         | <i>P<sub>ADH1</sub>-2xMYC-DHFR-RFS-2xHA-T<sub>CYC1</sub>::URA3</i>                                              | pLD57                     |
| pFO2         | <i>P<sub>ADH1</sub>-2xMYC-DHFR-IF-2xHA::T<sub>CYC1</sub>::URA3</i>                                              | pLD57                     |
| pLD57        | <i>P<sub>URA3</sub>-URA3-T<sub>URA3</sub> (with polylinker)</i>                                                 | pUC21                     |
| pRS315       | <i>CEN/LEU2</i>                                                                                                 | [64]                      |
| pUC19        | <i>E. coli</i> cloning vector with Amp <sup>R</sup>                                                             | [66]                      |
| pUC21        | <i>E. coli</i> cloning vector with Amp <sup>R</sup>                                                             | [65]                      |
| pJET1.2      | <i>E. coli</i> cloning vector with Amp <sup>R</sup>                                                             | ThermoFisher              |
| pFA6-His3MX6 | <i>His3MX6</i>                                                                                                  | [56] Longtine 1998        |
| pFA6-KanMX6  | <i>KanMX6</i>                                                                                                   | [56] Longtine 1998        |
| pPW66R       | <i>Ub-R-DHFR<sup>td</sup>-CDC28</i>                                                                             | [51] Dohmen 1994          |

**Table S4 – Antibodies used in this study**

| Antibody                                   | Host   | Dilution | Source                    |
|--------------------------------------------|--------|----------|---------------------------|
| Anti-HA (3F10)                             | rat    | 1:1000   | Merck                     |
| Anti-Myc (9B11)                            | mouse  | 1:1000   | Cell Signaling Technology |
| Anti-Hypusine                              | rabbit | 1:2000   | Merck                     |
| Anti-Rabbit, Alexa Fluor Plus 800 (A32735) | goat   | 1:5000   | Thermo Fisher             |
| Anti-Mouse, Alexa Fluor Plus 680 (A32729)  | goat   | 1:20000  | Thermo Fisher             |
| Anti-Mouse, Alexa Fluor 680 (A21096)       | goat   | 1:5000   | Thermo Fisher             |
